# Supplementary material for: Common Factors in Neurodegeneration: A Meta-Study Revealing Shared Patterns on a Multi-Omics Scale
Source: MDPI journal article supplement (doi:10.3390/cells9122642), 2020-12-08
Supplement: s1 [file s1]

## Supplementary Tables

**Table S1.** Overview of studies used for gathering transcriptomic data—GWAS Catalog study information. AD = Alzheimer’s disease, PD = Parkinson’s disease, (s)ALS =(sporadic) Amyotrophic Lateral Sclerosis, HD = Huntington’s disease, ctrl = control, CSF = cerebrospinal fluid, BA = Brodman Area.

| Study                                  | Participants                                                                                                                                           | Comparison                                                      | Paper                                                                                                                                                | Disease             |
|----------------------------------------|--------------------------------------------------------------------------------------------------------------------------------------------------------|-----------------------------------------------------------------|------------------------------------------------------------------------------------------------------------------------------------------------------|---------------------|
| (Nazarian, Yashin and Kulminski, 2019) | 952 European ancestry male cases, 1,789 European ancestry female cases, 6,337 European ancestry male controls, 8,402 European ancestry female controls | NA                                                              | Genome-wide analysis of genetic predisposition to Alzheimer’s disease and related sex disparities.                                                   | Alzheimer’s disease |
| (Nazarian <i>et al.</i> , 2019)        | 796 European ancestry cases, 4,010 European ancestry controls                                                                                          | NA                                                              | Genetic heterogeneity of Alzheimer’s disease in subjects with and without hypertension.                                                              | Alzheimer’s disease |
| (Beecham <i>et al.</i> , 2009)         | 492 European ancestry cases, 496 European ancestry controls                                                                                            | 238 European ancestry cases, 220 European ancestry controls     | Genome-wide association study implicates a chromosome 12 risk locus for late-onset Alzheimer disease.                                                | Alzheimer’s disease |
| (Carrasquillo <i>et al.</i> , 2009)    | 844 European ancestry cases, 1,255 European ancestry controls                                                                                          | 1,547 European ancestry cases, 1,209 European ancestry controls | Genetic variation in <i>PCDH11X</i> is associated with susceptibility to late-onset Alzheimer’s disease.                                             | Alzheimer’s disease |
| (Abraham <i>et al.</i> , 2008)         | 1,082 European ancestry cases, 1,239 European ancestry controls                                                                                        | 1,400 controls                                                  | A genome-wide association study for late-onset Alzheimer’s disease using DNA pooling.                                                                | Alzheimer’s disease |
| (Webster <i>et al.</i> , 2007)         | 664 cases, 422 controls                                                                                                                                | NA                                                              | <i>SORL1</i> as an Alzheimer’s disease predisposition gene?                                                                                          | Alzheimer’s disease |
| (Coon <i>et al.</i> , 2007)            | 664 European ancestry cases, 422 European ancestry controls                                                                                            | NA                                                              | A high-density whole-genome association study reveals that <i>APOE</i> is the major susceptibility gene for sporadic late-onset Alzheimer’s disease. | Alzheimer’s disease |
| (Heinzen <i>et al.</i> , 2010)         | 331 European ancestry cases, 368                                                                                                                       | NA                                                              | Genome-wide scan of copy number variation                                                                                                            | Alzheimer’s disease |

| European ancestry controls     |                                                                                       |                             | in late-onset Alzheimer's disease.                                                                                                             |                     |
|--------------------------------|---------------------------------------------------------------------------------------|-----------------------------|------------------------------------------------------------------------------------------------------------------------------------------------|---------------------|
| (Naj <i>et al.</i> , 2010)     | 931 cases, 1,104 controls                                                             | 1,338 cases, 2,003 controls | Dementia revealed: novel chromosome 6 locus for late-onset Alzheimer disease provides genetic evidence for folate-pathway abnormalities.       | Alzheimer's disease |
| (Logue <i>et al.</i> , 2011)   | 513 African American cases, 496 African American controls                             | NA                          | A comprehensive genetic association study of Alzheimer disease in African Americans.                                                           | Alzheimer's disease |
| (Hu <i>et al.</i> , 2011)      | 1,831 European ancestry cases, 1,764 European ancestry controls                       | 751 cases, 751 controls     | Meta-analysis for genome-wide association study identifies multiple variants at the BIN1 locus associated with late-onset Alzheimer's disease. | Alzheimer's disease |
| (Sherva <i>et al.</i> , 2014)  | 303 European ancestry cases                                                           |                             | Genome-wide association study of the rate of cognitive decline in Alzheimer's disease.                                                         | Alzheimer's disease |
| (Lo <i>et al.</i> , 2019)      | 2,399 European ancestry cases, 4,160 European ancestry controls                       | NA                          | Identification of genetic heterogeneity of Alzheimer's disease across age.                                                                     | Alzheimer's disease |
| (Zhu <i>et al.</i> , 2019)     | 54,162 European ancestry cases, 58,047 European ancestry individuals                  | NA                          | Shared genetic architecture between metabolic traits and Alzheimer's disease: a large-scale genome-wide cross-trait analysis.                  | Alzheimer's disease |
| (Feulner <i>et al.</i> , 2010) | 491 European ancestry cases, 479 European ancestry controls                           | NA                          | Examination of the current top candidate genes for AD in a genome-wide association study.                                                      | Alzheimer's disease |
| (Kramer <i>et al.</i> , 2011)  | 185 European ancestry low NFT individuals, 114 European ancestry high NFT individuals | NA                          | Alzheimer disease pathology in cognitively healthy elderly: a genome-wide study.                                                               | Alzheimer's disease |

|                                         |                                                                                                                                                                |                                                               |                                                                                                                                                         |                     |
|-----------------------------------------|----------------------------------------------------------------------------------------------------------------------------------------------------------------|---------------------------------------------------------------|---------------------------------------------------------------------------------------------------------------------------------------------------------|---------------------|
| (Meda <i>et al.</i> , 2012)             | 367 European ancestry individuals with mild cognitive impairment, 181 European ancestry individuals with mild early-stage LOAD, 209 European ancestry controls | NA                                                            | A large scale multivariate parallel ICA method reveals novel imaging-genetic relationships for Alzheimer's disease in the ADNI cohort.                  | Alzheimer's disease |
| (Kamboh, Barmada, <i>et al.</i> , 2012) | 1,190 European ancestry cases, 1,032 cases                                                                                                                     | NA                                                            | Genome-wide association analysis of age-at-onset in Alzheimer's disease.                                                                                | Alzheimer's disease |
| (Chung <i>et al.</i> , 2018)            | 190 European ancestry Alzheimer's disease dementia cases                                                                                                       | NA                                                            | Genome-wide association study of Alzheimer's disease endophenotypes at prediagnosis stages.                                                             | Alzheimer's disease |
| (Nazarian <i>et al.</i> , 2019)         | 1,262 European ancestry cases, 9,608 European ancestry controls                                                                                                | NA                                                            | Genetic heterogeneity of Alzheimer's disease in subjects with and without hypertension.                                                                 | Alzheimer's disease |
| (Herold <i>et al.</i> , 2016)           | 2,478 European ancestry cases, 979 ancestry controls both from the same 1,070 families                                                                         | NA                                                            | Family-based association analyses of imputed genotypes reveal genome-wide significant association of Alzheimer's disease with OSBPL6, PTPRG, and PDCL3. | Alzheimer's disease |
| (Cummings <i>et al.</i> , 2012)         | 109 Amish cases, 689 Amish controls                                                                                                                            | NA                                                            | Genome-wide association and linkage study in the Amish detects a novel candidate late-onset Alzheimer disease gene.                                     | Alzheimer's disease |
| (Tosto <i>et al.</i> , 2015)            | 2,451 Caribbean Hispanic cases, 2,063 Caribbean Hispanic controls                                                                                              | 550 Caribbean Hispanic cases, 236 Caribbean Hispanic controls | F-box/LRR-repeat protein 7 is genetically associated with Alzheimer's disease.                                                                          | Alzheimer's disease |
| (Pérez-Palma <i>et al.</i> , 2014)      | 2,540 European ancestry cases, 2,029 European ancestry controls                                                                                                | NA                                                            | Overrepresentation of glutamate signaling in Alzheimer's disease: network-based pathway enrichment using meta-analysis of                               | Alzheimer's disease |

|                                            |                                                                                                                                                |                                                                                          |                                                                                                                                          |                     |
|--------------------------------------------|------------------------------------------------------------------------------------------------------------------------------------------------|------------------------------------------------------------------------------------------|------------------------------------------------------------------------------------------------------------------------------------------|---------------------|
|                                            |                                                                                                                                                |                                                                                          | genome-wide association studies.                                                                                                         |                     |
| (Wang <i>et al.</i> , 2015)                | 983 cases                                                                                                                                      | NA                                                                                       | Genetic Determinants of Survival in Patients with Alzheimer's Disease.                                                                   | Alzheimer's disease |
| (Yashin <i>et al.</i> , 2018)              | 12,169 European ancestry individuals, 2,078 Black individuals, 4,053 unknown ancestry individuals                                              | NA                                                                                       | Hidden heterogeneity in Alzheimer's disease: Insights from genetic association studies and other analyses.                               | Alzheimer's disease |
| (Reiman <i>et al.</i> , 2007)              | 446 cases, 290 controls                                                                                                                        | 415 cases, 260 controls                                                                  | GAB2 alleles modify Alzheimer's risk in APOE epsilon4 carriers.                                                                          | Alzheimer's disease |
| (Kim <i>et al.</i> , 2011)                 | 96 European ancestry Alzheimer disease cases, 176 European ancestry individuals with mild cognitive impairment, 102 European ancestry controls | NA                                                                                       | Genome-wide association study of CSF biomarkers Abeta1-42, t-tau, and p-tau181p in the ADNI cohort.                                      | Alzheimer's disease |
| (Kamboh, Demirci, <i>et al.</i> , 2012)    | 1,291 European ancestry cases, 938 European ancestry controls                                                                                  | 509 European ancestry cases, 753 European ancestry controls, 2,218 cases, 2,583 controls | Genome-wide association study of Alzheimer's disease.                                                                                    | Alzheimer's disease |
| (Stein <i>et al.</i> , 2010)               | 173 European ancestry Alzheimer's disease cases, 361 European ancestry Mild Cognitive Impairment cases, 208 European ancestry controls         | NA                                                                                       | Genome-wide analysis reveals novel genes influencing temporal lobe structure with relevance to neurodegeneration in Alzheimer's disease. | Alzheimer's disease |
| (Martinelli-Boneschi <i>et al.</i> , 2013) | 92 European ancestry cases, 77 European ancestry controls                                                                                      | 94 European ancestry cases, 74 European ancestry controls                                | Pharmacogenomics in Alzheimer's disease: a genome-wide association study of response to cholinesterase inhibitors.                       | Alzheimer's disease |

|                                |                                                                                                                                                                                                           |                                                                                            |                                                                                                                                                    |                     |
|--------------------------------|-----------------------------------------------------------------------------------------------------------------------------------------------------------------------------------------------------------|--------------------------------------------------------------------------------------------|----------------------------------------------------------------------------------------------------------------------------------------------------|---------------------|
| (Bertram <i>et al.</i> , 2008) | 941 European ancestry cases and 404 European ancestry controls from 410 families                                                                                                                          | 1,767 European ancestry cases and 838 European ancestry controls from 875 families         | Genome-wide association analysis reveals putative Alzheimer's disease susceptibility loci in addition to APOE.                                     | Alzheimer's disease |
| (Lo <i>et al.</i> , 2019)      | 7,316 European ancestry cases, 7,579 European ancestry controls                                                                                                                                           | NA                                                                                         | Identification of genetic heterogeneity of Alzheimer's disease across age.                                                                         | Alzheimer's disease |
| (Ramanan <i>et al.</i> , 2014) | 555 European ancestry individuals                                                                                                                                                                         | NA                                                                                         | APOE and BCHE as modulators of cerebral amyloid deposition: a florbetapir PET genome-wide association study.                                       | Alzheimer's disease |
| (Chung <i>et al.</i> , 2018)   | 190 European ancestry AD dementia cases                                                                                                                                                                   | NA                                                                                         | Genome-wide association study of Alzheimer's disease endophenotypes at prediagnosis stages.                                                        | Alzheimer's disease |
| (Jonsson <i>et al.</i> , 2013) | 3,550 European ancestry cases, 8,888 European ancestry controls                                                                                                                                           | 694 European ancestry cases, 4,375 European ancestry controls, 1,343 cases, 5,352 controls | Variant of TREM2 associated with the risk of Alzheimer's disease.                                                                                  | Alzheimer's disease |
| (Lee <i>et al.</i> , 2017)     | 242 European ancestry individuals                                                                                                                                                                         | NA                                                                                         | Single-nucleotide polymorphisms are associated with cognitive decline at Alzheimer's disease conversion within mild cognitive impairment patients. | Alzheimer's disease |
| (Marioni <i>et al.</i> , 2018) | up to 42,034 British ancestry individuals with parental history of Alzheimer's disease, at least 272,244 British ancestry individuals with no parental history of Alzheimer's disease, 25,580 Alzheimer's | NA                                                                                         | GWAS on family history of Alzheimer's disease.                                                                                                     | Alzheimer's disease |

|                                   |                                                                                                                                                                                                                                                                                                                                                       |                                                                                                                                                                                                                                                                                                                                                                   |                                                                                                                                                                |                        |
|-----------------------------------|-------------------------------------------------------------------------------------------------------------------------------------------------------------------------------------------------------------------------------------------------------------------------------------------------------------------------------------------------------|-------------------------------------------------------------------------------------------------------------------------------------------------------------------------------------------------------------------------------------------------------------------------------------------------------------------------------------------------------------------|----------------------------------------------------------------------------------------------------------------------------------------------------------------|------------------------|
|                                   | disease cases,<br>48,466 controls                                                                                                                                                                                                                                                                                                                     |                                                                                                                                                                                                                                                                                                                                                                   |                                                                                                                                                                |                        |
| (Traylor <i>et al.</i> ,<br>2016) | 17,008 European<br>ancestry<br>Alzheimer's<br>disease cases,<br>3,651 European<br>ancestry small<br>vessel stroke<br>cases, 95,811<br>European ancestry<br>controls                                                                                                                                                                                   | NA                                                                                                                                                                                                                                                                                                                                                                | Shared genetic<br>contribution to<br>Ischaemic Stroke and<br>Alzheimer's Disease.                                                                              | Alzheimer's<br>disease |
| (Furney <i>et al.</i> ,<br>2011)  | 424 European<br>ancestry mild<br>cognitive<br>impairment cases,<br>236 European<br>ancestry<br>Alzheimer's<br>disease cases, 279<br>European ancestry<br>controls                                                                                                                                                                                     | NA                                                                                                                                                                                                                                                                                                                                                                | Genome-wide<br>association with MRI<br>atrophy measures as a<br>quantitative trait locus<br>for Alzheimer's<br>disease.                                        | Alzheimer's<br>disease |
| (Hirano <i>et al.</i> ,<br>2015)  | 489 Japanese<br>ancestry APOE- $\epsilon$ 4<br>noncarrier cases,<br>6,463 Japanese<br>ancestry APOE- $\epsilon$ 4<br>noncarrier<br>controls, 323<br>Japanese ancestry<br>APOE- $\epsilon$ 4 carrier<br>cases, 1,484<br>Japanese ancestry<br>APOE- $\epsilon$ 4 carrier<br>controls, 4<br>Japanese ancestry<br>cases, 45 Japanese<br>ancestry controls | 528 Japanese<br>ancestry APOE-<br>$\epsilon$ 4 noncarrier<br>cases, 5,824<br>Japanese<br>ancestry APOE-<br>$\epsilon$ 4 noncarrier<br>controls, 480<br>Japanese<br>ancestry APOE-<br>$\epsilon$ 4 carrier cases,<br>1,364 Japanese<br>ancestry APOE-<br>$\epsilon$ 4 carrier<br>controls, 3<br>Japanese<br>ancestry cases,<br>24 Japanese<br>ancestry<br>controls | A genome-wide<br>association study of<br>late-onset Alzheimer's<br>disease in a Japanese<br>population.                                                        | Alzheimer's<br>disease |
| (Wijsman <i>et al.</i> ,<br>2011) | 1,848 European<br>ancestry affected<br>individuals, 1,991<br>European ancestry<br>unaffected<br>individuals                                                                                                                                                                                                                                           | 231 Caribbean<br>Hispanic cases,<br>187 Caribbean<br>Hispanic<br>controls, 386<br>European<br>ancestry cases,<br>386 European                                                                                                                                                                                                                                     | Genome-wide<br>association of familial<br>late-onset Alzheimer's<br>disease replicates<br>BIN1 and CLU and<br>nominates CUGBP2 in<br>interaction with<br>APOE. | Alzheimer's<br>disease |

| ancestry controls                |                                                                                          |                                                                                                                                        |                                                                                                                                                                                   |                     |
|----------------------------------|------------------------------------------------------------------------------------------|----------------------------------------------------------------------------------------------------------------------------------------|-----------------------------------------------------------------------------------------------------------------------------------------------------------------------------------|---------------------|
| (Kauwe <i>et al.</i> , 2014)     | 574 individuals                                                                          | NA                                                                                                                                     | Genome-wide association study of CSF levels of 59 alzheimer's disease candidate proteins: significant associations with proteins involved in amyloid processing and inflammation. | Alzheimer's disease |
| (Deming <i>et al.</i> , 2016)    | 123 Alzheimer's disease cases, 270 controls                                              | NA                                                                                                                                     | A potential endophenotype for Alzheimer's disease: cerebrospinal fluid clusterin.                                                                                                 | Alzheimer's disease |
| (Mukherjee <i>et al.</i> , 2018) | Up to 1,107 European ancestry cases, 3,447 European ancestry controls                    | NA                                                                                                                                     | Genetic data and cognitively defined late-onset Alzheimer's disease subgroups.                                                                                                    | Alzheimer's disease |
| (Antúnez <i>et al.</i> , 2011)   | 319 European ancestry cases, 769 European ancestry controls, 2,690 cases, 2,237 controls | 4,982 European ancestry cases, 7,961 European ancestry controls, 2,190 cases, 3,374 controls                                           | The membrane-spanning 4-domains, subfamily A (MS4A) gene cluster contains a common variant associated with Alzheimer's disease.                                                   | Alzheimer's disease |
| (Lambert <i>et al.</i> , 2009)   | 2,032 European ancestry cases, 5,328 European ancestry controls                          | 3,978 European ancestry cases, 3,297 European ancestry controls                                                                        | Genome-wide association study identifies variants at CLU and CR1 associated with Alzheimer's disease.                                                                             | Alzheimer's disease |
| (Li <i>et al.</i> , 2008)        | 753 European ancestry cases, 736 European ancestry controls                              | 418 European ancestry cases, 249 European ancestry controls                                                                            | Candidate single-nucleotide polymorphisms from a genomewide association study of Alzheimer disease.                                                                               | Alzheimer's disease |
| (Miyashita <i>et al.</i> , 2013) | 891 Japanese ancestry cases, 844 Japanese ancestry controls                              | 1,224 East Asian ancestry cases, 2,114 East Asian ancestry controls, 11,840 European ancestry cases, 10,931 European ancestry controls | SORL1 is genetically associated with late-onset Alzheimer's disease in Japanese, Koreans and Caucasians.                                                                          | Alzheimer's disease |

|                                      |                                                                                                                                                                                    |                                                                                   |                                                                                                                                                             |                     |
|--------------------------------------|------------------------------------------------------------------------------------------------------------------------------------------------------------------------------------|-----------------------------------------------------------------------------------|-------------------------------------------------------------------------------------------------------------------------------------------------------------|---------------------|
| (Cruchaga <i>et al.</i> , 2013)      | 591 European ancestry cases, 687 European ancestry controls                                                                                                                        |                                                                                   | GWAS of cerebrospinal fluid tau levels identifies risk variants for Alzheimer's disease.                                                                    | Alzheimer's disease |
| (Reitz <i>et al.</i> , 2013)         | 1,968 African American cases, 3,928 African American controls                                                                                                                      |                                                                                   | Variants in the ATP-binding cassette transporter (ABCA7), apolipoprotein E $\epsilon$ 4, and the risk of late-onset Alzheimer disease in African Americans. | Alzheimer's disease |
| (Hollingsworth <i>et al.</i> , 2012) | 1,039 European ancestry cases with psychosis, 5,659 European ancestry controls, 260 European, African American and Native American ancestry cases with psychosis from 264 families | NA                                                                                | Genome-wide association study of Alzheimer's disease with psychotic symptoms.                                                                               | Alzheimer's disease |
| (Seshadri <i>et al.</i> , 2010)      | 973 incident AD cases, 2,033 prevalent AD cases, 22,604 controls of European and Hispanic ancestry                                                                                 | 6,505 European ancestry cases, 13,532 European ancestry controls                  | Genome-wide analysis of genetic loci associated with Alzheimer disease.                                                                                     | Alzheimer's disease |
| (Gusareva <i>et al.</i> , 2018)      | 788 male cases, 1,455 female cases, 2,362 male controls, 3,655 female controls                                                                                                     | 3,836 male cases, 6,244 female cases, 8,618 male controls, 11,624 female controls | Male-specific epistasis between WWC1 and TLN2 genes is associated with Alzheimer's disease.                                                                 | Alzheimer's disease |
| (Nelson <i>et al.</i> , 2014)        | 1443 cases and 99 controls                                                                                                                                                         | NA                                                                                | ABCC9 gene polymorphism is associated with hippocampal sclerosis of aging pathology.                                                                        | Alzheimer's disease |
| (Jansen <i>et al.</i> , 2019)        | 24,087 European ancestry late-onset Alzheimer's disease cases, 47,793 European ancestry individuals with family history of Alzheimer's                                             | NA                                                                                | Genome-wide meta-analysis identifies new loci and functional pathways influencing Alzheimer's disease risk.                                                 | Alzheimer's disease |



|                                       |                                                                                                                                                                                                                                                                                                                  |                                                                              |                                                                                                                                                                                                                    |                        |
|---------------------------------------|------------------------------------------------------------------------------------------------------------------------------------------------------------------------------------------------------------------------------------------------------------------------------------------------------------------|------------------------------------------------------------------------------|--------------------------------------------------------------------------------------------------------------------------------------------------------------------------------------------------------------------|------------------------|
|                                       | disease, 383,378<br>European ancestry<br>controls                                                                                                                                                                                                                                                                |                                                                              |                                                                                                                                                                                                                    |                        |
| (Moreno-Grau<br><i>et al.</i> , 2019) | 4,120 European<br>ancestry cases,<br>3,289 European<br>ancestry controls                                                                                                                                                                                                                                         | NA                                                                           | Genome-wide<br>association analysis of<br>dementia and its<br>clinical<br>endophenotypes<br>reveal novel loci<br>associated with<br>Alzheimer's disease<br>and three causality<br>networks: The<br>GR@ACE project. | Alzheimer's<br>disease |
| (Schott <i>et al.</i> ,<br>2016)      | 293 cases, 10,547<br>healthy controls                                                                                                                                                                                                                                                                            | NA                                                                           | Genetic risk factors for<br>the posterior cortical<br>atrophy variant of<br>Alzheimer's disease.                                                                                                                   | Alzheimer's<br>disease |
| (Ramirez <i>et al.</i> ,<br>2014)     | 363 European<br>ancestry<br>individuals                                                                                                                                                                                                                                                                          | 515 individuals                                                              | SUCLG2 identified as<br>both a determinant of<br>CSF A $\beta$ 1-42 levels and<br>an attenuator of<br>cognitive decline in<br>Alzheimer's disease.                                                                 | Alzheimer's<br>disease |
| (Jun <i>et al.</i> ,<br>2017)         | 13,100 European<br>ancestry cases,<br>13,220 European<br>ancestry controls,<br>1,472 African<br>American cases,<br>3,511 African<br>American<br>controls, 951<br>Japanese ancestry<br>cases, 894<br>Japanese ancestry<br>controls, 51<br>Israeli-Arab<br>ancestry cases, 64<br>Israeli-Arab<br>ancestry controls | 5,813 European<br>ancestry cases,<br>20,474 European<br>ancestry<br>controls | Transethnic genome-<br>wide scan identifies<br>novel Alzheimer's<br>disease loci.                                                                                                                                  | Alzheimer's<br>disease |
| (Mukherjee <i>et al.</i> , 2018)      | Up to 510<br>European ancestry<br>cases, 3,447<br>European ancestry<br>controls                                                                                                                                                                                                                                  | NA                                                                           | Genetic data and<br>cognitively defined<br>late-onset Alzheimer's<br>disease subgroups.                                                                                                                            | Alzheimer's<br>disease |
| (Harold <i>et al.</i> ,<br>2009)      | 3,941 European<br>ancestry cases,<br>7,848 European<br>ancestry controls                                                                                                                                                                                                                                         | 2,023 European<br>ancestry cases,<br>2,340 European<br>ancestry<br>controls  | Genome-wide<br>association study<br>identifies variants at<br>CLU and PICALM                                                                                                                                       | Alzheimer's<br>disease |

|                                             |                                                                                                                                                                                    |                                                                   |                                                                                                             |                     |
|---------------------------------------------|------------------------------------------------------------------------------------------------------------------------------------------------------------------------------------|-------------------------------------------------------------------|-------------------------------------------------------------------------------------------------------------|---------------------|
|                                             |                                                                                                                                                                                    |                                                                   | associated with Alzheimer's disease.                                                                        |                     |
| (J. C. Lambert <i>et al.</i> , 2013)        | 2,025 European ancestry cases, 5,328 European ancestry controls                                                                                                                    | 7,913 European ancestry cases, 10,417 European ancestry controls  | Genome-wide haplotype association study identifies the FRMD4A gene as a risk locus for Alzheimer's disease. | Alzheimer's disease |
| (Jansen <i>et al.</i> , 2019)               | 24,087 European ancestry late-onset Alzheimer's disease cases, 47,793 European ancestry individuals with family history of Alzheimer's disease, 383,378 European ancestry controls | NA                                                                | Genome-wide meta-analysis identifies new loci and functional pathways influencing Alzheimer's disease risk. | Alzheimer's disease |
| (Jun <i>et al.</i> , 2016)                  | 7,184 cases, 26,968 controls                                                                                                                                                       | 718 European ancestry cases, 1,699 European ancestry controls     | A novel Alzheimer disease locus located near the gene encoding tau protein.                                 | Alzheimer's disease |
| (Hollingworth <i>et al.</i> , 2011)         | 6,688 European ancestry cases, 13,685 European ancestry controls                                                                                                                   | 13,182 European ancestry cases, 26,161 European ancestry controls | Common variants at ABCA7, MS4A6A/MS4A4E, EPHA1, CD33 and CD2AP are associated with Alzheimer's disease.     | Alzheimer's disease |
| (Naj <i>et al.</i> , 2011)                  | 8,309 European ancestry cases, 7,366 European ancestry controls                                                                                                                    | 10,523 European ancestry cases, 28,231 European ancestry controls | Common variants at MS4A4/MS4A6E, CD2AP, CD33 and EPHA1 are associated with late-onset Alzheimer's disease.  | Alzheimer's disease |
| (Jean Charles Lambert <i>et al.</i> , 2013) | 17,008 European ancestry cases, 37,154 European ancestry controls                                                                                                                  | 8,572 European ancestry cases, 11,312 European ancestry controls  | Meta-analysis of 74,046 individuals identifies 11 new susceptibility loci for Alzheimer's disease.          | Alzheimer's disease |
| (Chung <i>et al.</i> , 2012)                | 443 European ancestry cases                                                                                                                                                        | NA                                                                | Genomic determinants of motor and cognitive outcomes in Parkinson's disease.                                | Parkinson's disease |
| (Wallen <i>et al.</i> , 2018)               | 1,950 European ancestry cases                                                                                                                                                      | 726 European ancestry cases                                       | Plasticity-related gene 3 (LPPR1) and age at diagnosis of Parkinson disease.                                | Parkinson's disease |

|                                   |                                                                                                                                |                                                                                                           |                                                                                                                                                          |                     |
|-----------------------------------|--------------------------------------------------------------------------------------------------------------------------------|-----------------------------------------------------------------------------------------------------------|----------------------------------------------------------------------------------------------------------------------------------------------------------|---------------------|
| (Hu <i>et al.</i> , 2016)         | 250 Han Chinese ancestry cases, 250 Han Chinese ancestry controls                                                              | NA                                                                                                        | A Pooling Genome-Wide Association Study Combining a Pathway Analysis for Typical Sporadic Parkinson's Disease in the Han Population of Chinese Mainland. | Parkinson's disease |
| (Pickrell <i>et al.</i> , 2016)   | 9,619 European ancestry cases, 324,522 European ancestry controls                                                              | NA                                                                                                        | Detection and interpretation of shared genetic influences on 42 human traits.                                                                            | Parkinson's disease |
| (Nalls <i>et al.</i> , 2011)      | 5,333 European ancestry cases, 12,019 European ancestry controls                                                               | 7,053 cases, 9,007 controls                                                                               | Imputation of sequence variants for identification of genetic risks for Parkinson's disease: a meta-analysis of genome-wide association studies.         | Parkinson's disease |
| (Hamza <i>et al.</i> , 2010)      | 2,000 European ancestry cases, 1,986 European ancestry controls                                                                | Up to 1,447 cases, 1,468 controls                                                                         | Common genetic variation in the HLA region is associated with late-onset sporadic Parkinson's disease.                                                   | Parkinson's disease |
| (Maraganore <i>et al.</i> , 2005) | 381 European ancestry cases, 363 European ancestry controls, 62 cases, 79 controls, 1 Asian ancestry control from 443 sibships | 269 European ancestry cases, 272 European ancestry controls, 62 cases, 60 controls, 1 Asian ancestry case | High-resolution whole-genome association study of Parkinson disease.                                                                                     | Parkinson's disease |
| (Fung <i>et al.</i> , 2006)       | 267 European ancestry cases, 270 European ancestry controls                                                                    | NA                                                                                                        | Genome-wide genotyping in Parkinson's disease and neurologically normal controls: first stage analysis and public release of data.                       | Parkinson's disease |
| (Satake <i>et al.</i> , 2009)     | 988 Japanese ancestry cases, 2,521 Japanese ancestry controls                                                                  | 933 Japanese ancestry cases, 15,753 Japanese ancestry controls                                            | Genome-wide association study identifies common variants at four loci as genetic risk factors for Parkinson's disease.                                   | Parkinson's disease |
| (Pankratz <i>et al.</i> , 2009)   | 1,119 European ancestry cases,                                                                                                 | NA                                                                                                        | Genomewide association study for susceptibility genes                                                                                                    | Parkinson's disease |

|                                   |                                                                                                                                                        |                                                                                                                                                      |                                                                                                                                |                     |
|-----------------------------------|--------------------------------------------------------------------------------------------------------------------------------------------------------|------------------------------------------------------------------------------------------------------------------------------------------------------|--------------------------------------------------------------------------------------------------------------------------------|---------------------|
|                                   | 1,127 European ancestry controls                                                                                                                       |                                                                                                                                                      | contributing to familial Parkinson disease.                                                                                    |                     |
| (Edwards <i>et al.</i> , 2010)    | 1,752 European ancestry cases, 1,745 European ancestry controls                                                                                        | NA                                                                                                                                                   | Genome-wide association study confirms SNPs in SNCA and the MAPT region as common risk factors for Parkinson disease.          | Parkinson's disease |
| (Do <i>et al.</i> , 2011)         | 3,426 European ancestry cases, 29,624 European ancestry controls                                                                                       | NA                                                                                                                                                   | Web-based genome-wide association study identifies two novel loci and a substantial genetic component for Parkinson's disease. | Parkinson's disease |
| (Liu <i>et al.</i> , 2011)        | 268 Ashkenazi Jewish cases, 178 Ashkenazi Jewish controls                                                                                              | 1,782 European ancestry cases, 1,658 European ancestry controls                                                                                      | Genome-wide association study identifies candidate genes for Parkinson's disease in an Ashkenazi Jewish population.            | Parkinson's disease |
| (Hill-Burns <i>et al.</i> , 2014) | 1,565 European ancestry sporadic Parkinson's disease cases, 435 European ancestry familial Parkinson's disease cases, 1,986 European ancestry controls | 1,528 European ancestry sporadic Parkinson's disease cases, 707 European ancestry familial Parkinson's disease cases, 796 European ancestry controls | Identification of a novel Parkinson's disease locus via stratified genome-wide association study.                              | Parkinson's disease |
| (Davis <i>et al.</i> , 2013)      | 31 Amish cases, 767 Amish controls                                                                                                                     | NA                                                                                                                                                   | Parkinson disease loci in the mid-western Amish.                                                                               | Parkinson's disease |
| (Biernacka <i>et al.</i> , 2016)  | 364 cases, 364 sibling controls                                                                                                                        | NA                                                                                                                                                   | Genome-wide gene-environment interaction analysis of pesticide exposure and risk of Parkinson's disease.                       | Parkinson's disease |
| (Chang <i>et al.</i> , 2017)      | 20,184 European ancestry cases, 397,324 European ancestry controls                                                                                     | 5,851 European ancestry cases, 5,866 European ancestry controls                                                                                      | A meta-analysis of genome-wide association studies identifies 17 new Parkinson's disease risk loci.                            | Parkinson's disease |

|                                   |                                                                      |                                                                 |                                                                                                                                                  |                     |
|-----------------------------------|----------------------------------------------------------------------|-----------------------------------------------------------------|--------------------------------------------------------------------------------------------------------------------------------------------------|---------------------|
| (Hill-Burns <i>et al.</i> , 2016) | 431 European ancestry cases                                          | 737 European ancestry cases                                     | Identification of genetic modifiers of age-at-onset for familial Parkinson's disease.                                                            | Parkinson's disease |
| (Nalls <i>et al.</i> , 2011)      | 5,333 European ancestry cases, 12,019 European ancestry controls     | 7,053 cases, 9,007 controls                                     | Imputation of sequence variants for identification of genetic risks for Parkinson's disease: a meta-analysis of genome-wide association studies. | Parkinson's disease |
| (Saad <i>et al.</i> , 2011)       | 1,039 European ancestry cases, 1,984 European ancestry controls      | 3,232 European ancestry cases, 7,064 European ancestry controls | Genome-wide association study confirms BST1 and suggests a locus on 12q24 as the risk loci for Parkinson's disease in the European population.   | Parkinson's disease |
| (Hamza <i>et al.</i> , 2010)      | 2,000 European ancestry cases, 1,986 European ancestry controls      | Up to 1,447 cases, 1,468 controls                               | Common genetic variation in the HLA region is associated with late-onset sporadic Parkinson's disease.                                           | Parkinson's disease |
| (Pankratz <i>et al.</i> , 2012)   | 4,238 European ancestry cases, 4,239 European ancestry controls      | 3,738 European ancestry cases, 2,111 European ancestry controls | Meta-analysis of Parkinson's disease: identification of a novel locus, RIT2.                                                                     | Parkinson's disease |
| (Latourelle <i>et al.</i> , 2009) | 857 European ancestry familial cases, 440 idiopathic cases           | 747 European ancestry idiopathic cases                          | Genomewide association study for onset age in Parkinson disease.                                                                                 | Parkinson's disease |
| (Vacic <i>et al.</i> , 2014)      | 1,130 Ashkenazi Jewish cases, 2,611 Ashkenazi Jewish controls        | 306 Ashkenazi Jewish cases, 2,583 Ashkenazi Jewish controls     | Genome-wide mapping of IBD segments in an Ashkenazi PD cohort identifies associated haplotypes.                                                  | Parkinson's disease |
| (Foo <i>et al.</i> , 2017)        | 779 Han Chinese ancestry cases, 13,227 Han Chinese ancestry controls | 5,125 Asian ancestry cases, 17,604 Asian ancestry controls      | Genome-wide association study of Parkinson's disease in East Asians.                                                                             | Parkinson's disease |
| (Beecham <i>et al.</i> , 2015)    | 484 European ancestry cases, 1,145 European ancestry controls        | NA                                                              | PARK10 is a major locus for sporadic neuropathologically                                                                                         | Parkinson's disease |

|                                      |                                                                                                          |                                                                              |                                                                                                                                                     |                     |
|--------------------------------------|----------------------------------------------------------------------------------------------------------|------------------------------------------------------------------------------|-----------------------------------------------------------------------------------------------------------------------------------------------------|---------------------|
|                                      |                                                                                                          |                                                                              | confirmed Parkinson disease.                                                                                                                        |                     |
| (Simón-Sánchez <i>et al.</i> , 2009) | 1,713 European ancestry cases, 3,978 European ancestry controls                                          | 3,361 European ancestry cases, 4,573 European ancestry controls              | Genome-wide association study reveals genetic risk underlying Parkinson's disease.                                                                  | Parkinson's disease |
| (Nalls <i>et al.</i> , 2019)         | 15,056 European ancestry cases, 18,618 European ancestry proxy cases, 449,056 European ancestry controls | 22,632 European ancestry cases, 968,735 European ancestry controls           | Identification of novel risk loci, causal insights, and heritable risk for Parkinson's disease: a meta-analysis of genome-wide association studies. | Parkinson's disease |
| (Blauwendraat <i>et al.</i> , 2020)  | 1,588 European ancestry cases, 7,584 European ancestry controls                                          | up to 1,194 European ancestry cases, up to 13,901 European ancestry controls | Genetic modifiers of risk and age at onset in GBA associated Parkinson's disease and Lewy body dementia.                                            | Parkinson's disease |
| (Spencer <i>et al.</i> , 2011)       | 1,705 European ancestry cases, 5,175 European ancestry controls                                          | 1,039 European ancestry cases, 1,984 European ancestry controls              | Dissection of the genetics of Parkinson's disease identifies an additional association of SNCA and multiple associated haplotypes at 17q21.         | Parkinson's disease |
| (Lill <i>et al.</i> , 2012)          | 2,197 cases, 2,061 controls                                                                              | Up to 98,080 European and Asian ancestry individuals                         | Comprehensive research synopsis and systematic meta-analyses in Parkinson's disease genetics: The PDGene database.                                  | Parkinson's disease |
| (Blauwendraat <i>et al.</i> , 2019)  | 17,996 cases                                                                                             | 10,572 cases                                                                 | Parkinson's disease age at onset genome-wide association study: Defining heritability, genetic loci, and $\alpha$ -synuclein mechanisms.            | Parkinson's disease |
| (Nalls <i>et al.</i> , 2014)         | 13,708 European ancestry cases, 95,282 European ancestry controls                                        | 5,353 European ancestry cases, 5,551 European ancestry controls              | Large-scale meta-analysis of genome-wide association data identifies six new risk loci for Parkinson's disease.                                     | Parkinson's disease |

|                                     |                                                                               |                                                             |                                                                                                                                                                      |                               |
|-------------------------------------|-------------------------------------------------------------------------------|-------------------------------------------------------------|----------------------------------------------------------------------------------------------------------------------------------------------------------------------|-------------------------------|
| (Bandres-Ciga <i>et al.</i> , 2019) | 3,997 Spanish ancestry individuals                                            | NA                                                          | The Genetic Architecture of Parkinson Disease in Spain: Characterizing Population-Specific Risk, Differential Haplotype Structures, and Providing Etiologic Insight. | Parkinson's disease           |
| (Pottier <i>et al.</i> , 2018)      | 184 European ancestry cases, 198 European ancestry controls                   | NA                                                          | Potential genetic modifiers of disease risk and age at onset in patients with frontotemporal lobar degeneration and GRN mutations: a genome-wide association study.  | Parkinson's disease           |
| (Chao <i>et al.</i> , 2018)         | 374 Venezuelan ancestry individuals, 4,061 European ancestry individuals      | NA                                                          | Population-specific genetic modification of Huntington's disease in Venezuela.                                                                                       | Huntington's disease          |
| (Moss <i>et al.</i> , 2017)         | 1,989 European and unknown ancestry mutation carriers                         | NA                                                          | Identification of genetic variants associated with Huntington's disease progression: a genome-wide association study.                                                | Huntington's disease          |
| (Cronin <i>et al.</i> , 2009)       | 958 European ancestry cases, 932 European ancestry controls                   | 309 European ancestry cases, 404 European ancestry controls | Screening for replication of genome-wide SNP associations in sporadic ALS.                                                                                           | Amyotrophic lateral sclerosis |
| (Chen <i>et al.</i> , 2016)         | 94 Taiwanese Han ancestry cases, 376 Taiwanese Han ancestry controls          | NA                                                          | A genome-wide association study on amyotrophic lateral sclerosis in the Taiwanese Han population.                                                                    | Amyotrophic lateral sclerosis |
| (McLaughlin <i>et al.</i> , 2015)   | 25 European ancestry C9orf72-positive cases, 1,179 European ancestry controls | NA                                                          | Second-generation Irish genome-wide association study for amyotrophic lateral sclerosis.                                                                             | Amyotrophic lateral sclerosis |
| (Schymick <i>et al.</i> , 2007)     | 276 European ancestry cases, 271 European ancestry controls                   | NA                                                          | Genome-wide genotyping in amyotrophic lateral sclerosis and neurologically normal                                                                                    | Amyotrophic lateral sclerosis |

|                                    |                                                                                   |                                                                                 | controls: first stage analysis and public release of data.                                                                      |                               |
|------------------------------------|-----------------------------------------------------------------------------------|---------------------------------------------------------------------------------|---------------------------------------------------------------------------------------------------------------------------------|-------------------------------|
| (Cronin <i>et al.</i> , 2008)      | 221 Genetically Homogenous Irish cases, 211 Genetically Homogenous Irish controls | 737 European ancestry cases, 721 European ancestry controls                     | A genome-wide association study of sporadic ALS in a homogenous Irish population.                                               | Amyotrophic lateral sclerosis |
| (van Es <i>et al.</i> , 2007)      | 461 European ancestry cases, 450 European ancestry controls                       | 876 European ancestry cases, 906 European ancestry controls                     | ITPR2 as a susceptibility gene in sporadic amyotrophic lateral sclerosis: a genome-wide association study.                      | Amyotrophic lateral sclerosis |
| (Laaksovirta <i>et al.</i> , 2010) | 405 European ancestry cases, 497 European ancestry controls                       | NA                                                                              | Chromosome 9p21 in amyotrophic lateral sclerosis in Finland: a genome-wide association study.                                   | Amyotrophic lateral sclerosis |
| (Kwee <i>et al.</i> , 2012)        | Up to 639 European ancestry cases, 6,257 European ancestry controls               | Up to 183 European ancestry cases, 961 European ancestry controls               | A high-density genome-wide association screen of sporadic ALS in US veterans.                                                   | Amyotrophic lateral sclerosis |
| (Van Es <i>et al.</i> , 2008)      | 737 European ancestry cases, 721 European ancestry controls                       | 1,030 European ancestry cases, 1,195 European ancestry controls                 | Genetic variation in DPP6 is associated with susceptibility to amyotrophic lateral sclerosis.                                   | Amyotrophic lateral sclerosis |
| (Wei <i>et al.</i> , 2019)         | 666 Han Chinese ancestry cases, 3,988 Han Chinese ancestry controls               | up to 884 Han Chinese ancestry cases, up to 5,329 Han Chinese ancestry controls | Identification of TYW3/CRYZ and FGD4 as susceptibility genes for amyotrophic lateral sclerosis.                                 | Amyotrophic lateral sclerosis |
| (Dekker <i>et al.</i> , 2019)      | 4,244 European ancestry cases, 3,106 European ancestry controls                   | NA                                                                              | Exome array analysis of rare and low frequency variants in amyotrophic lateral sclerosis.                                       | Amyotrophic lateral sclerosis |
| (Shatunov <i>et al.</i> , 2010)    | 4,857 European ancestry cases, 8,987 European ancestry controls                   | NA                                                                              | Chromosome 9p21 in sporadic amyotrophic lateral sclerosis in the UK and seven other countries: a genome-wide association study. | Amyotrophic lateral sclerosis |



|                                    |                                                                                                       |                                                                     |                                                                                                                                         |                               |
|------------------------------------|-------------------------------------------------------------------------------------------------------|---------------------------------------------------------------------|-----------------------------------------------------------------------------------------------------------------------------------------|-------------------------------|
| (Van Es <i>et al.</i> , 2009)      | 2,323 European ancestry cases, 9,013 European ancestry controls                                       | 2,532 European ancestry cases, 5,940 European ancestry controls     | Genome-wide association study identifies 19p13.3 (UNC13A) and 9p21.2 as susceptibility loci for sporadic amyotrophic lateral sclerosis. | Amyotrophic lateral sclerosis |
| (Langefeld, 2013)                  | 4,243 European ancestry cases                                                                         | NA                                                                  | Age of onset of amyotrophic lateral sclerosis is modulated by a locus on 1p34.1.                                                        | Amyotrophic lateral sclerosis |
| (Deng <i>et al.</i> , 2013)        | 506 Han Chinese ancestry cases, 1,859 Han Chinese ancestry controls                                   | 706 Han Chinese ancestry cases, 1,777 Han Chinese ancestry controls | Genome-wide association analyses in Han Chinese identify two new susceptibility loci for amyotrophic lateral sclerosis.                 | Amyotrophic lateral sclerosis |
| (Goris <i>et al.</i> , 2014)       | 4,088 Multiple sclerosis cases, 3,762 Amyotrophic lateral sclerosis cases, 12,030 controls            | NA                                                                  | No evidence for shared genetic basis of common variants in multiple sclerosis and amyotrophic lateral sclerosis.                        | Amyotrophic lateral sclerosis |
| (Diekstra <i>et al.</i> , 2014)    | 4,377 European ancestry ALS cases, 435 European ancestry FTD cases, 14,431 European ancestry controls | 4,056 European ancestry ALS cases, 3,958 European ancestry controls | C9orf72 and UNC13A are shared risk loci for amyotrophic lateral sclerosis and frontotemporal dementia: a genome-wide meta-analysis.     | Amyotrophic lateral sclerosis |
| (Landers <i>et al.</i> , 2009)     | 1,821 cases, 2,258 controls                                                                           | 538 cases, 556 controls                                             | Reduced expression of the Kinesin-Associated Protein 3 (KIFAP3) gene increases survival in sporadic amyotrophic lateral sclerosis.      | Amyotrophic lateral sclerosis |
| (Van Rheenen <i>et al.</i> , 2016) | 12,577 European ancestry cases, 23,475 European ancestry controls                                     | 2,579 European ancestry cases, 2,767 European ancestry controls     | Genome-wide association analyses identify new risk variants and the genetic architecture of amyotrophic lateral sclerosis.              | Amyotrophic lateral sclerosis |
| (Nicolas <i>et al.</i> , 2018)     | 20,806 European ancestry cases, 59,804 European ancestry controls                                     | 4,159 cases, 18,650 controls                                        | Genome-wide Analyses Identify KIF5A as a Novel ALS Gene.                                                                                | Amyotrophic lateral sclerosis |

**Table S2.** Overview of studies used for gathering transcriptomic data—Transcriptome study information. AD = Alzheimer’s disease, PD = Parkinson’s disease, (s)ALS = (sporadic) amyotrophic lateral sclerosis, HD = Huntington’s disease, ctrl = control, CSF = cerebrospinal fluid, BA = Brodman Area.

| Study                            | Participants Per Experiment                                                                                               | Participants Total for Disease                 | Tissue                                                                                                                                                         |
|----------------------------------|---------------------------------------------------------------------------------------------------------------------------|------------------------------------------------|----------------------------------------------------------------------------------------------------------------------------------------------------------------|
| (Berchtold <i>et al.</i> , 2013) | 26 AD, 33 old ctrl, 22 young ctrl                                                                                         | 26 AD (13 severe, 9 moderate, 2 mild), 55 ctrl | Entorhinal Cortex, Hippocampus, Postcentral Gyrus, Superior Frontal Cortex                                                                                     |
| (Hokama <i>et al.</i> , 2014)    | FC: 15 AD, 18 ctrl;<br>Temporal Cortex: 10 AD, 19 ctrl;<br>Hippocampus: 7 AD, 10 ctrl                                     | 32 AD (severe), 47 ctrl                        | Frontal Cortex, Temporal Cortex, Hippocampus                                                                                                                   |
| (Blalock <i>et al.</i> , 2004)   | 22 AD, 9 ctrl                                                                                                             | 22 AD (7 severe, 8 moderate, 7 mild), 9 ctrl   | Hippocampus                                                                                                                                                    |
| (Blalock <i>et al.</i> , 2011)   | 22 AD (7 incipient, 8 moderate, 7 severe), 8 ctrl                                                                         | 22 AD (7 severe, 8 moderate, 7 mild), 8 ctrl   | CA1 hippocampal gray matter                                                                                                                                    |
| (Liang <i>et al.</i> , 2007)     | EC: 10 AD, 13 ctrl; HIP: 10 AD, 13 ctrl; MTG: 16 AD, 12 ctrl; PC: 9 AD, 13 ctrl; SFG: 23 AD, 11 ctrl; VCX: 19 AD, 12 ctrl | 24 severe AD, 10 moderate AD, 14 ctrl          | EC=Entorhinal Cortex;<br>HIP=Hippocampus;<br>MTG=Medial temporal gyrus;<br>PC=Posterior Singulate;<br>SFG=Superior Frontal Gyrus;<br>VCX=Primary visual cortex |
| (Magistri <i>et al.</i> , 2015)  | 4 LOAD, 4 ctrl                                                                                                            | 4 AD (severe), 4 ctrl                          | Hippocampus                                                                                                                                                    |
| (Dunckley <i>et al.</i> , 2006)  | 19 AD, 14 ctrl                                                                                                            | 19 AD (moderate), 14 ctrl                      | Entorhinal cortex                                                                                                                                              |
| (Scheckel <i>et al.</i> , 2016)  | 9 AD, 8 ctrl                                                                                                              | 9 AD (severe), 8 ctrl                          | Brain                                                                                                                                                          |
| (Meyer <i>et al.</i> , 2019)     | 5 AD, 5 ctrl                                                                                                              | 5 AD, 5 ctrl                                   | iPSC induced neurons                                                                                                                                           |
| (Mathys <i>et al.</i> , 2019)    | 24 AD, 24 ctrl                                                                                                            | 24 moderate AD (high $\beta$ -amyloid),        | 80660 sc transcriptomes from prefrontal cortex, 6 different                                                                                                    |

|                                    |                                                                         |                                             |                                                                                                                                                   |
|------------------------------------|-------------------------------------------------------------------------|---------------------------------------------|---------------------------------------------------------------------------------------------------------------------------------------------------|
|                                    |                                                                         | 24 mild ctrl<br>(no $\beta$ -amyloid)       | celltypes:<br>astrocytes,<br>excitatory neurons,<br>inhibitory neurons,<br>microglia,<br>oligodendrocyte<br>progenitor cells,<br>oligodendrocytes |
| (Stopa <i>et al.</i> , 2018)       | 7 AD, 3 HD, 6 ctrl                                                      | 6 severe<br>AD, 1<br>moderate<br>AD, 6 ctrl | choroid plexus                                                                                                                                    |
| (Simunovic <i>et al.</i> , 2009)   | 10 PD, 9 ctrl                                                           | 10 PD, 9 ctrl                               | neurons of<br>Substantia nigra                                                                                                                    |
| (Elstner <i>et al.</i> , 2011)     | 11 PD, 11 old ctrl, 8 young<br>ctrl                                     | 11 PD, 19<br>ctrl                           | neurons of<br>Substantia nigra                                                                                                                    |
| (Riley <i>et al.</i> , 2014)       | 16 PD-20 ctrl (FC), 17 PD-<br>17 ctrl (striatum), 16 PD-14<br>ctrl (SN) | 24 PD, 22<br>ctrl                           | Cortex, Striatum,<br>Substantia nigra                                                                                                             |
| (Dijkstra <i>et al.</i> , 2015)    | 9 PD, 8 ctrl                                                            | 9 PD, 8 ctrl                                | Substantia nigra                                                                                                                                  |
| (Dumitriu <i>et al.</i> , 2012)    | 27 PD, 26 ctrl                                                          | 27 PD, 26<br>ctrl                           | prefrontal cortex<br>(BA9)                                                                                                                        |
| (Dumitriu <i>et al.</i> , 2016)    | 29 PD, 44 ctrl                                                          | 29 PD, 44<br>ctrl                           | prefrontal cortex<br>(BA9)                                                                                                                        |
| (Scherzer <i>et al.</i> , 2007)    | 50 PD, 22 ctrl                                                          | 50 mild PD,<br>22 ctrl                      | whole blood                                                                                                                                       |
| (Lesnick <i>et al.</i> , 2007)     | 16 PD, 9 ctrl                                                           | 16 PD, 9 ctrl                               | Substantia nigra                                                                                                                                  |
| (Zhang <i>et al.</i> , 2005)       | 15 PD, 15 ctrl (each tissue)                                            | 15 PD, 15<br>ctrl                           | Prefrontal cortex<br>(BA9), substantia<br>nigra                                                                                                   |
| <b>GSE20333_Edna_2010_PD</b>       | 6 PD, 6 ctrl                                                            | 6 PD, 6 ctrl                                | Substantia nigra                                                                                                                                  |
| (Calligaris <i>et al.</i> , 2015)  | 40 PD, 20 ctrl                                                          | 40 mild PD,<br>20 ctrl                      | Blood                                                                                                                                             |
| (Ring <i>et al.</i> , 2015)        | 16 HD, 16 ctrl                                                          | 16 severe<br>HD, 16 ctrl                    | Transcriptomic<br>analysis of HD<br>iPSCs and HD<br>NSCs compared to<br>isogenic controls<br>using RNA-Seq.                                       |
| (Świtońska <i>et al.</i> , 2019)   | 2HD, 2 ctrl                                                             | 2 severe<br>HD, 2 ctrl                      | HD and control<br>iPSC lines                                                                                                                      |
| (Al-Dalahmah <i>et al.</i> , 2020) | 6 HD Grad III/IV, 6 ctrl                                                | 6 severe<br>HD, 6 ctrl                      | astrocytes of<br>singulate cortex                                                                                                                 |
| (Labadorf <i>et al.</i> , 2015)    | 20 HD, 49 ctrl, male                                                    | 20 severe<br>HD, 49 ctrl                    | prefrontal cortex,<br>Brodman Area 9                                                                                                              |
| (Lin <i>et al.</i> , 2016)         | 7 HD, 7 ctrl                                                            | 7 severe<br>HD, 7 ctrl                      | motor cortex                                                                                                                                      |
| (Feyeux <i>et al.</i> , 2012)      | 6 HD, 4 ctrl                                                            | 6 mild HD,<br>4 ctrl                        | embryonic stem<br>cells                                                                                                                           |

|                                       |                                             |                            |                                                    |
|---------------------------------------|---------------------------------------------|----------------------------|----------------------------------------------------|
| (Lim, Salazar, <i>et al.</i> , 2017)  | 6 HD, 4 ctrl                                | 6 HD, 4 ctrl               | iPSC derived neural cells                          |
| (Lim, Quan, <i>et al.</i> , 2017)     | 4 HD, 2 ctrl                                | 4 HD, 2 ctrl               | iPSC induced brain microvascular endothelial cells |
| (Mehta <i>et al.</i> , 2018)          | 3 HD, 3 ctrl                                | 3 severe HD, 3 ctrl        | iPSC derived cortical neurons                      |
| (Stopa <i>et al.</i> , 2018)          | 7 AD, 3 HD, 6 ctrl                          | 3 HD, 6 ctrl               | choroid plexus                                     |
| (Cox <i>et al.</i> , 2010)            | 3 ALS, 7 ctrl                               | 3 ALS, 7 ctrl              | cervical spinal cord                               |
| (Otake, Kamiguchi and Hirozane, 2019) | 4 ALS, 4 ctrl                               | 4 ALS, 4 ctrl              | exosome mRNA in CSF                                |
| (Gagliardi <i>et al.</i> , 2018)      | 11 sALS, je 2 fALS(FUS,TARDBP,SOD1), 3 ctrl | 11 sALS, 3 ctrl            | blood_monocytes                                    |
| (Swindell <i>et al.</i> , 2019)       | 397 ALS, 645 ctrl                           | 397 moderate ALS, 645 ctrl | blood                                              |
| (Prudencio <i>et al.</i> , 2015)      | 19 ALS (10 sALS, 9 c9ALS), 9 ctrl           | 19 severe ALS, 9 ctrl      | Cerebellum (BA9/44), Frontal cortex (BA4)          |
| (Raman <i>et al.</i> , 2015)          | 6 sALS, 6 ctrl                              | 6 sALS, 6 ctrl             | Fibroblasts from skin cells                        |
| (Kapeli <i>et al.</i> , 2016)         | 13 sALS, 9 control                          | 13 sALS, 9 control         | human stem cell-derived motor neurons              |
| (Dols-Icardo <i>et al.</i> , 2020)    | 11 ALS, 8 ctrl                              | 11 ALS, 8 ctrl             | motor cortex, BA 4                                 |

**Table S3.** Overview of studies used for gathering proteomic data— Proteome study information. AD = Alzheimer's disease, PD = Parkinson's disease, ALS = amyotrophic lateral sclerosis, HD = Huntington's disease, ctrl = control, CSF = cerebrospinal fluid, BA = Brodman Area.

| Study                                        | Participants Per Experiment                                                                      | Participants Total for Disease          | Tissue                                                                      |
|----------------------------------------------|--------------------------------------------------------------------------------------------------|-----------------------------------------|-----------------------------------------------------------------------------|
| (Johnson <i>et al.</i> , 2020)               | 268A D, 104 asymptomatic AD, 99 ctrl                                                             | 268A D, 104 asymptomatic AD, 99 ctrl    | dorsolateral prefrontal cortex                                              |
| (Bader <i>et al.</i> , 2020)                 | 87 AD, 67 ctrl                                                                                   | 87 AD, 67 ctrl                          | CSF                                                                         |
| (Zhang <i>et al.</i> , 2018)                 | 8 AD, 8 ctrl                                                                                     | 8 severe AD, 8 ctrl                     | frontal cortex                                                              |
| (Seyfried <i>et al.</i> , 2017)              | Emory: each 8 AD, PD, ALS, ctrl;<br>BLSA: 20 AD (BA7), 20 AD (BA9), 15 ctrl (BA7), 13 ctrl (BA9) | 28 severe AD, 15 moderate, 22 mild ctrl | Emory: prefrontal cortex;<br>BLSA: prefrontal cortex (BA9), Precuneus (BA7) |
| (Higginbotham, Dammer, <i>et al.</i> , 2019) | 6 severe AD, 6 moderate AD, 6 mild ctrl                                                          | 6 severe AD, 6 moderate AD, 6 mild ctrl | middle frontal gyrus BA 8, BA 9                                             |
| (Higginbotham, Ping, <i>et al.</i> , 2019)   | CSF1: 20 AD, 20 ctrl; Brain1: 10 AD, 10 ctrl; Brain2: 9 AD, 10 ctrl; CSF2: 33 AD, 32 ctrl        | 72 severe AD, 72 mild ctrl              | dorsolateral prefrontal cortex                                              |

|                                            |                                                         |                                               |                                      |
|--------------------------------------------|---------------------------------------------------------|-----------------------------------------------|--------------------------------------|
| (Wingo <i>et al.</i> , 2020)               | 383 AD, 375 ctrl                                        | 122 severe AD, 101 moderate AD, 160 mild ctrl | dorsolateral prefrontal cortex (BA9) |
| (Lachén-Montes <i>et al.</i> , 2017)       | each 5 AD (3 states), 5 ctrl                            | 5 severe AD, 5 moderate AD, 5 mild AD, 5 ctrl | olfactory bulb                       |
| (Hondius <i>et al.</i> , 2016)             | 35 AD, 5 ctrl                                           | 7 severe AD, 7 moderate AD, 7 mild AD, 5 ctrl | hippocampus: CA1 + subiculum         |
| (Dumitriu <i>et al.</i> , 2016)            | 12 PD, 12 ctrl                                          | 12 PD, 12 ctrl                                | prefrontal cortex BA9                |
| (Rotunno <i>et al.</i> , 2020)             | Cohort 1: 53 PD, 72 ctrl<br>Cohort 2: 28 PD, 43 ctrl    | 81 moderate PD, 115 ctrl                      | CSF                                  |
| (Riley <i>et al.</i> , 2014)               | 3 PD, 3 ctrl (striatum), 5 PD, 5 ctrl (Cortex)          | 8 PD, 8 ctrl                                  | Striatum, cortex                     |
| (Seyfried <i>et al.</i> , 2017)            | 8 PD, 8 ctrl                                            | 8 PD, 8 ctrl                                  | Prefrontal cortex                    |
| (Lachén-Montes <i>et al.</i> , 2019)       | 21 PD, 8 ctrl                                           | 21 PD, 8 ctrl                                 | olfactory bulb                       |
| (Higginbotham, Ping, <i>et al.</i> , 2019) | 10 PD, 10 ctrl                                          | 10 PD, 10 ctrl                                | dorsolateral prefrontal cortex       |
| (van Dijk <i>et al.</i> , 2012)            | 6 PD, 6 ctrl                                            | 6 PD, 6 ctrl                                  | locus ceruleus                       |
| (Umoh <i>et al.</i> , 2018)                | 19 ALS, 10 ctrl                                         | 19 ALS, 10 ctrl                               | frontal cortex                       |
| (Oeckl <i>et al.</i> , 2020)               | 26 ALS, 16 ctrl (CSF), 8ALS, 7ctrl (spinal cord tissue) | 34 severe ALS, 21 asympt. ctrl                | CSF, spinal cord tissue              |
| (Iridoy <i>et al.</i> , 2019)              | 9 ALS, 8 ctrl                                           | 9 ALS, 8 ctrl                                 | anterior horn of spinal cord         |
| (Collins <i>et al.</i> , 2015)             | 90 sALS, 80 ctrl, pooled to 9 sALS, 8 ctrl              | 90 sALS, 80 ctrl                              | CSF                                  |
| (Varghese <i>et al.</i> , 2013)            | 10 ALS, 10 ctrl                                         | 10 ALS, 10 ctrl                               | CSF                                  |
| (Ratovitski <i>et al.</i> , 2016)          | 12 HD, 12 ctrl                                          | 12 HD, 12 ctrl                                | cortex                               |
| (Fang <i>et al.</i> , 2009)                | 10 earlyHD, 10 midHD, 10 ctrl                           | 10 earlyHD, 10 midHD, 10 ctrl                 | CSF                                  |
| (McQuade <i>et al.</i> , 2014)             | hESC: 3 HD, 3 ctrl<br>NSC: 4 HD, 4 ctrl                 | 7 adult-onset HD, 7 ctrl                      | hESC, NSC                            |
